# Supplementary material for: Characterization of the binding of strychnine with bovine β-lactoglobulin and human lysozyme using spectroscopic, kinetic and molecular docking analysis
Source: Royal Society of Chemistry journal article supplement (doi:10.1039/c8nj00810h), 2018-01-01
Supplement: c8nj00810h1.pdf [file c8nj00810h1.pdf]

**Characterization of the binding of Strychnine with bovine  $\beta$ -lactoglobulin and human lysozyme using spectroscopic, kinetic and molecular docking analysis**

Suparna Rudra, Abhisek Jana, Nayim Sepay, Biman Kumar Patel and Ambikesh Mahapatra\*

Department of Chemistry, Jadavpur University, Kolkata 700032, India

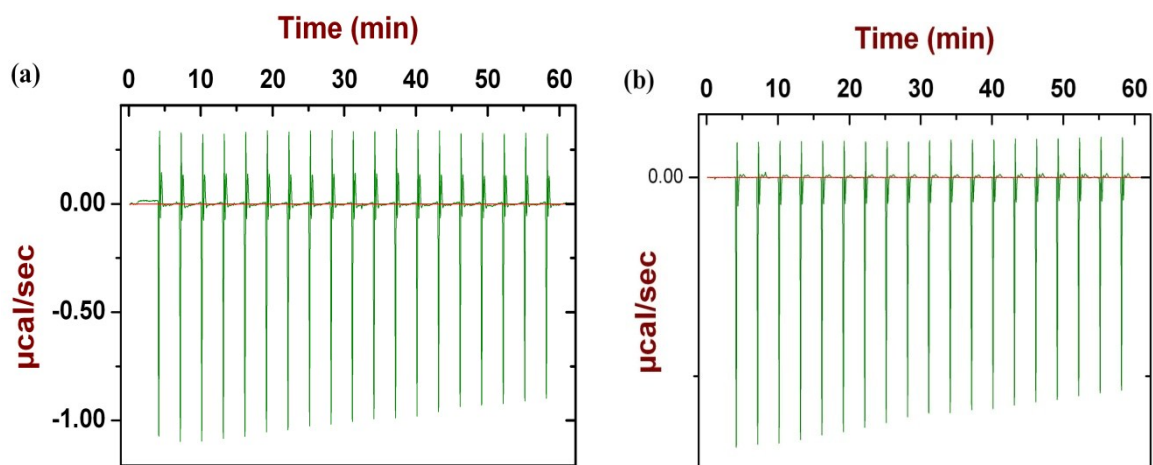

Fig. S1: the raw data for the integrated heat after correction for heat of dilution,  $\beta$ LG (a) and LYS (b)

Table S1: Summary of the ITC results for interaction of STN with  $\beta$ LG and LYS at 298 K

| System         | $-\Delta H$ (kJ mol <sup>-1</sup> ) | $-\Delta S$ (J mol <sup>-1</sup> K <sup>-1</sup> ) | n   | K $\times 10^{-3}$ |
|----------------|-------------------------------------|----------------------------------------------------|-----|--------------------|
| $\beta$ LG-STN | 25.45                               | 202.57                                             | 1.3 | 9.26               |
| LYS-STN        | 127.16                              | 359.66                                             | 1.4 | 3.18               |
